# Supplementary material for: New Sorbicillinoids from the Mangrove Endophytic Fungus Trichoderma reesei SCNU-F0042
Source: MDPI journal article supplement (doi:10.3390/md21080442), 2023-08-05
Supplement: s1 [file s1]

## Supplementary data

# New Sorbicillinoids from the Mangrove Endophytic Fungus *Trichoderma reesei* SCNU-F0042.

Jialin Li<sup>1</sup>, Tao Chen<sup>1</sup>, Jianchen Yu<sup>2</sup>, Hao Jia<sup>1</sup>, Chen Chen<sup>1</sup>, Yuhua Long<sup>1,\*</sup>

1 GDMPA Key Laboratory for Process Control and Quality Evaluation of Chiral Pharmaceuticals, School of Chemistry, South China Normal University, Guangzhou 510006, China; jialinli@m.scnu.edu.cn (J.L.); chent296@mail2.sysu.edu.cn (T.C.); haojia@m.scnu.edu.cn (H.J.); chenchen2021@m.scnu.edu.cn (C.C.);

2 Key Laboratory of Tropical Disease Control (Sun Yat-sen University), Ministry of Education, Guangzhou 510080, China; Department of Biochemistry, Zhongshan School of Medicine, Sun Yat-sen University, Guangzhou 510080, China; yujch3@mail.sysu.edu.cn (J.Y.)

\* Correspondence: longyh@scnu.edu.cn

## Contents

|                                                                                                                                           |    |
|-------------------------------------------------------------------------------------------------------------------------------------------|----|
| Figure.S1. <sup>1</sup> H NMR (methanol- <i>d</i> <sub>4</sub> , 600 MHz) spectrum of compound <b>1</b> .....                             | 1  |
| Figure.S2. <sup>13</sup> C NMR (methanol- <i>d</i> <sub>4</sub> , 150 MHz) spectrum of compound <b>1</b> .....                            | 1  |
| Figure.S3. <sup>1</sup> H, <sup>1</sup> H-COSY spectrum (methanol- <i>d</i> <sub>4</sub> , 600 MHz) spectrum of compound <b>1</b> .....   | 2  |
| Figure.S4. HSQC spectrum (methanol- <i>d</i> <sub>4</sub> , 600 MHz) spectrum of compound <b>1</b> .....                                  | 2  |
| Figure.S5. HMBC spectrum (methanol- <i>d</i> <sub>4</sub> , 600 MHz) spectrum of compound <b>1</b> .....                                  | 3  |
| Figure.S6. NOESY spectrum (methanol- <i>d</i> <sub>4</sub> , 600 MHz) spectrum of compound <b>1</b> .....                                 | 3  |
| Figure.S7. HR-ESI-MS spectrum of compound <b>1</b> .....                                                                                  | 4  |
| Figure.S8. <sup>1</sup> H NMR (methanol- <i>d</i> <sub>4</sub> , 600 MHz) spectrum of compound <b>2</b> .....                             | 4  |
| Figure.S9. <sup>13</sup> C NMR (methanol- <i>d</i> <sub>4</sub> , 150 MHz) spectrum of compound <b>2</b> .....                            | 5  |
| Figure.S10. <sup>1</sup> H, <sup>1</sup> H-COSY spectrum (methanol- <i>d</i> <sub>4</sub> , 600 MHz) spectrum of compound <b>2</b> .....  | 5  |
| Figure.S11. HSQC spectrum (methanol- <i>d</i> <sub>4</sub> , 600 MHz) spectrum of compound <b>2</b> .....                                 | 6  |
| Figure.S12. HMBC spectrum (methanol- <i>d</i> <sub>4</sub> , 600 MHz) spectrum of compound <b>2</b> .....                                 | 6  |
| Figure.S13. NOESY spectrum (methanol- <i>d</i> <sub>4</sub> , 600 MHz) spectrum of compound <b>2</b> .....                                | 7  |
| Figure.S14. HR-ESI-MS spectrum of compound <b>2</b> .....                                                                                 | 7  |
| Figure.S15. <sup>1</sup> H NMR (methanol- <i>d</i> <sub>4</sub> , 600 MHz) spectrum of compound <b>3</b> .....                            | 8  |
| Figure.S16. <sup>13</sup> C NMR (methanol- <i>d</i> <sub>4</sub> , 150 MHz) spectrum of compound <b>3</b> .....                           | 8  |
| Figure.S17. <sup>1</sup> H, <sup>1</sup> H- COSY spectrum (methanol- <i>d</i> <sub>4</sub> , 600 MHz) spectrum of compound <b>3</b> ..... | 9  |
| Figure.S18. HSQC spectrum (methanol- <i>d</i> <sub>4</sub> , 600 MHz) spectrum of compound <b>3</b> .....                                 | 9  |
| Figure.S19. HMBC spectrum (methanol- <i>d</i> <sub>4</sub> , 600 MHz) spectrum of compound <b>3</b> .....                                 | 10 |
| Figure.S20. NOESY spectrum (methanol- <i>d</i> <sub>4</sub> , 600 MHz) spectrum of compound <b>3</b> .....                                | 10 |
| Figure.S21. HR-ESI-MS spectrum of compound <b>3</b> .....                                                                                 | 11 |
| Figure.S22. <sup>1</sup> H NMR (acetone- <i>d</i> <sub>6</sub> , 600 MHz) spectrum of compound <b>5</b> .....                             | 11 |
| Figure.S23. <sup>13</sup> C NMR (acetone- <i>d</i> <sub>6</sub> , 150 MHz) spectrum of compound <b>5</b> .....                            | 12 |
| Figure.S24. <sup>1</sup> H, <sup>1</sup> H- COSY spectrum (acetone- <i>d</i> <sub>6</sub> , 600 MHz) spectrum of compound <b>5</b> .....  | 12 |
| Figure.S25. HSQC spectrum (acetone- <i>d</i> <sub>6</sub> , 600 MHz) spectrum of compound <b>5</b> .....                                  | 13 |
| Figure.S26. HMBC spectrum (acetone- <i>d</i> <sub>6</sub> , 600 MHz) spectrum of compound <b>5</b> .....                                  | 13 |
| Figure.S27. HR-ESI-MS spectrum of compound <b>5</b> .....                                                                                 | 14 |
| Figure.S28. Molecular networking of the EtOAc extract from strain <i>Trichoderma reesei</i> SCNU-F0042 .....                              | 15 |

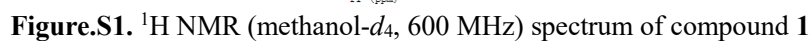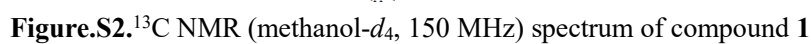

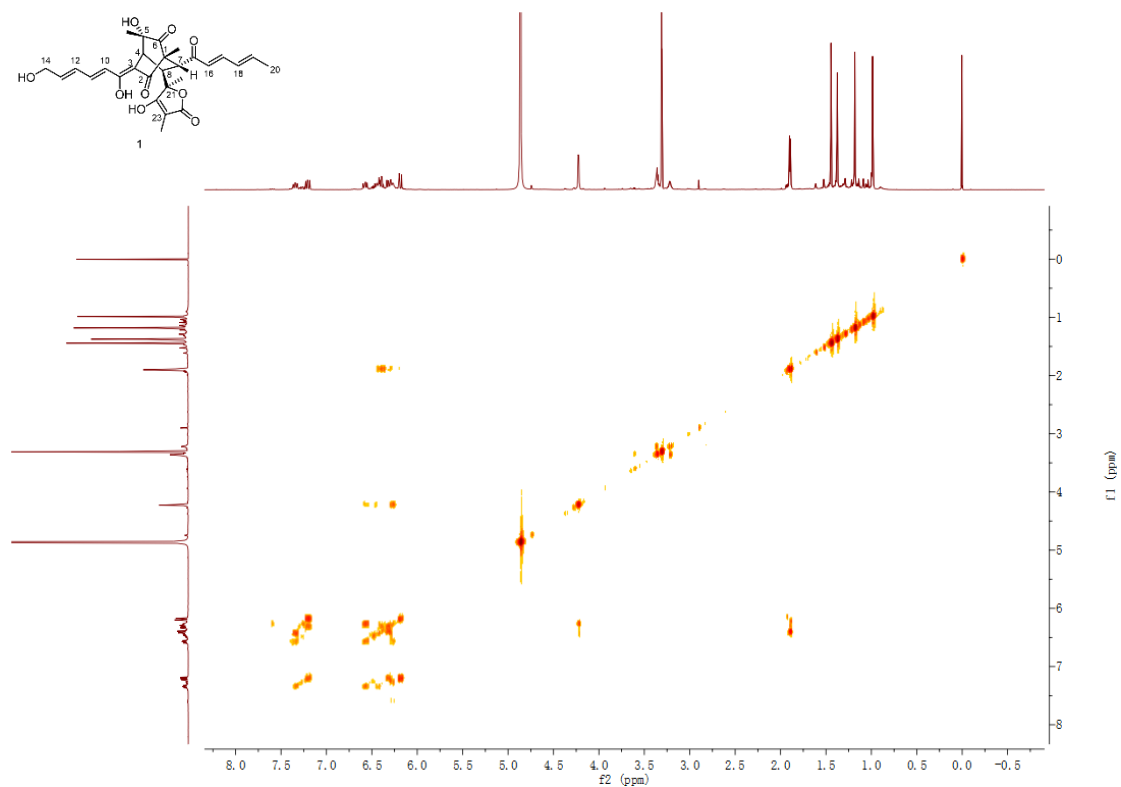

**Figure.S3.**  $^1\text{H}$ ,  $^1\text{H}$ -COSY spectrum (methanol- $d_4$ , 600 MHz) spectrum of compound **1**

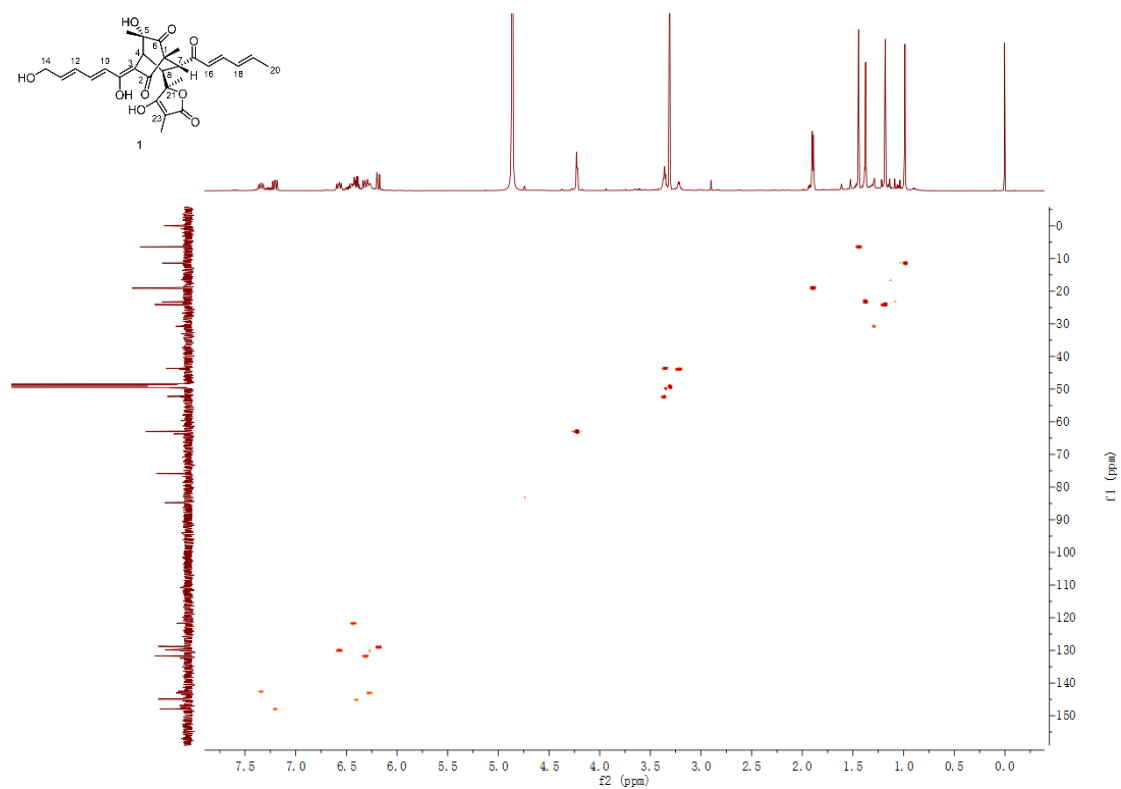

**Figure.S4.** HSQC spectrum (methanol- $d_4$ , 600 MHz) spectrum of compound **1**

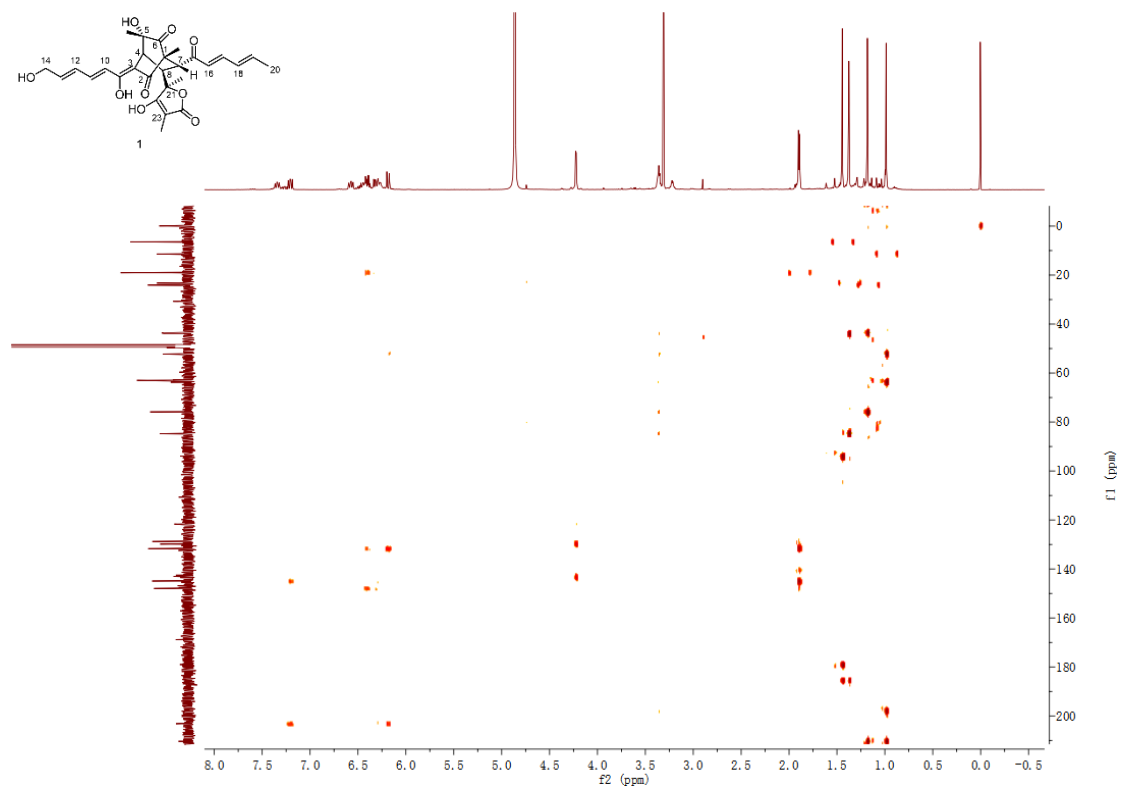

**Figure.S5.** HMBC spectrum (methanol- $d_4$ , 600 MHz) spectrum of compound **1**

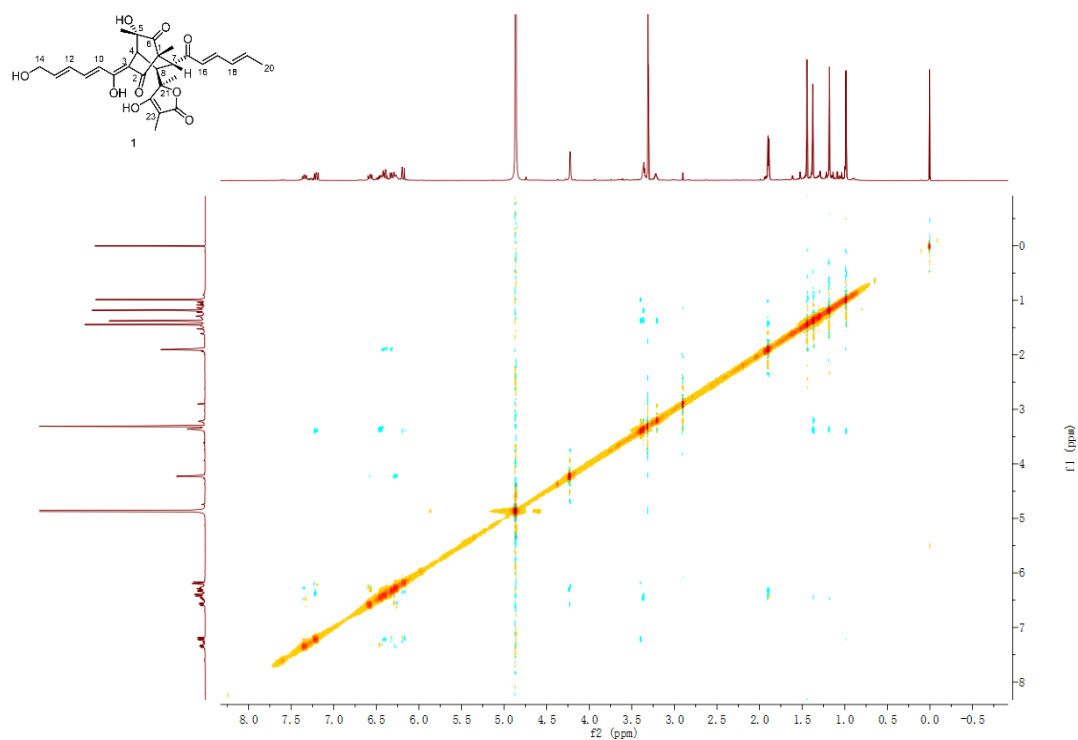

**Figure.S6.** NOESY spectrum (methanol- $d_4$ , 600 MHz) spectrum of compound **1**

2106A0617-2-neg\_HRMS #9-22 RT: 0.06-0.12 AV: 14 SB: 1 0.02 NL:  
T: FTMS - c ESI Full ms [100.00-1000.00]

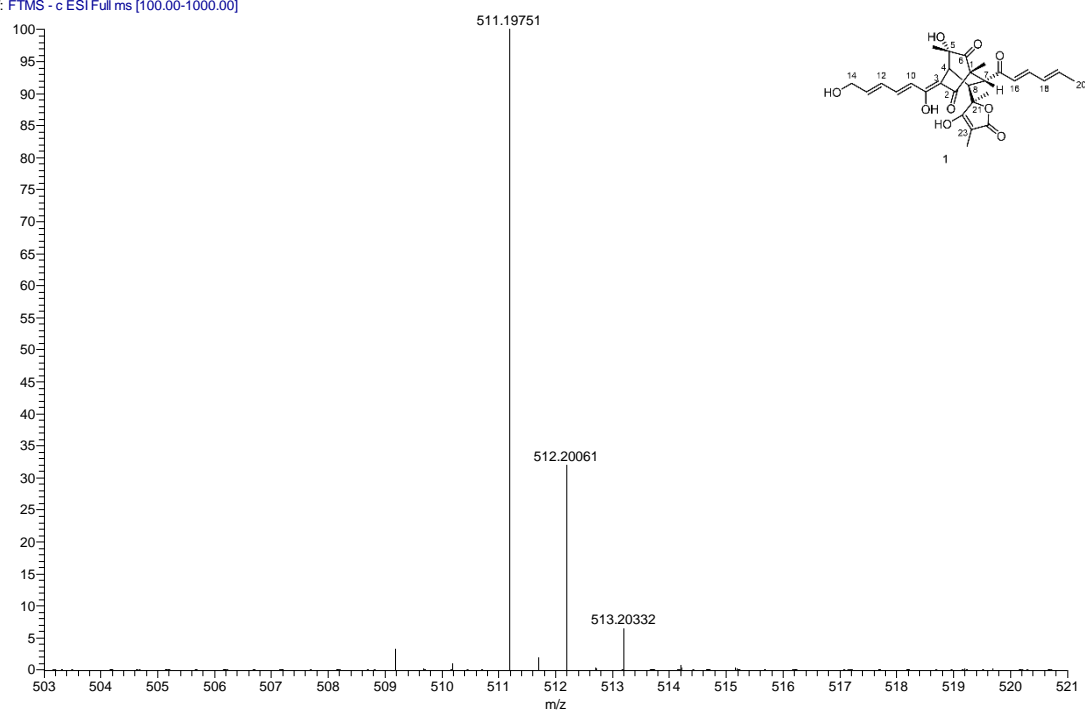

Figure.S7. HR-ESI-MS spectrum of compound 1

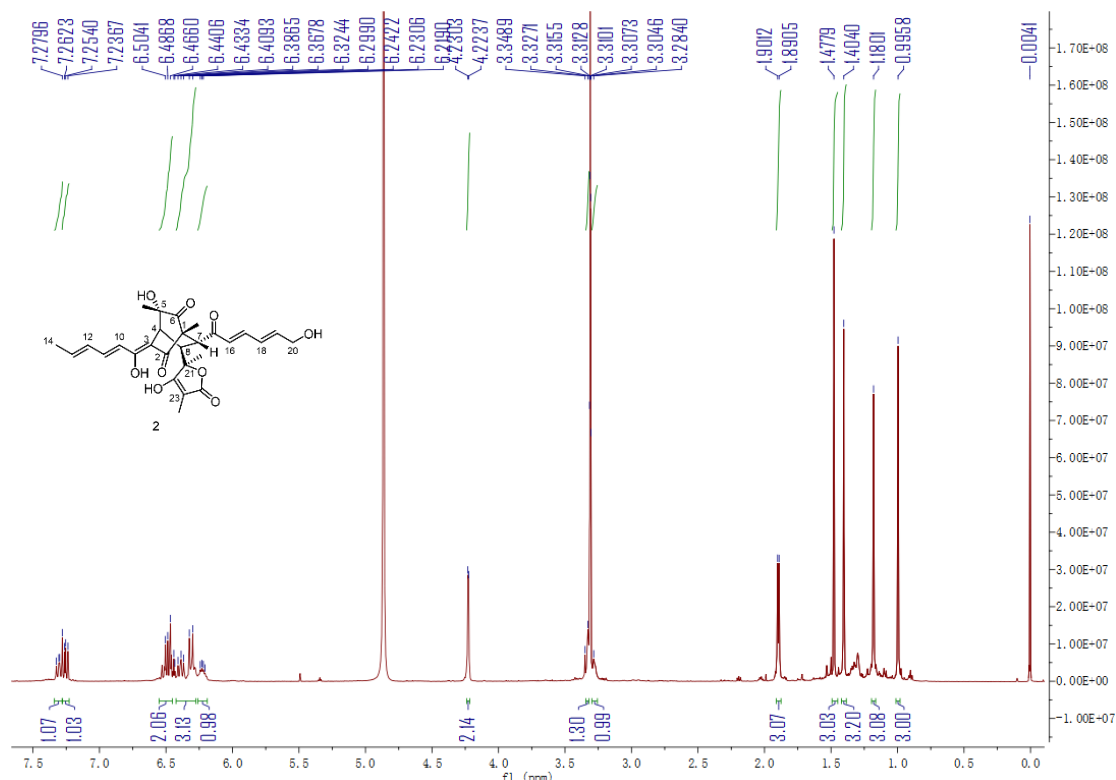

Figure.S8. <sup>1</sup>H NMR (methanol-*d*<sub>4</sub>, 600 MHz) spectrum of compound 2

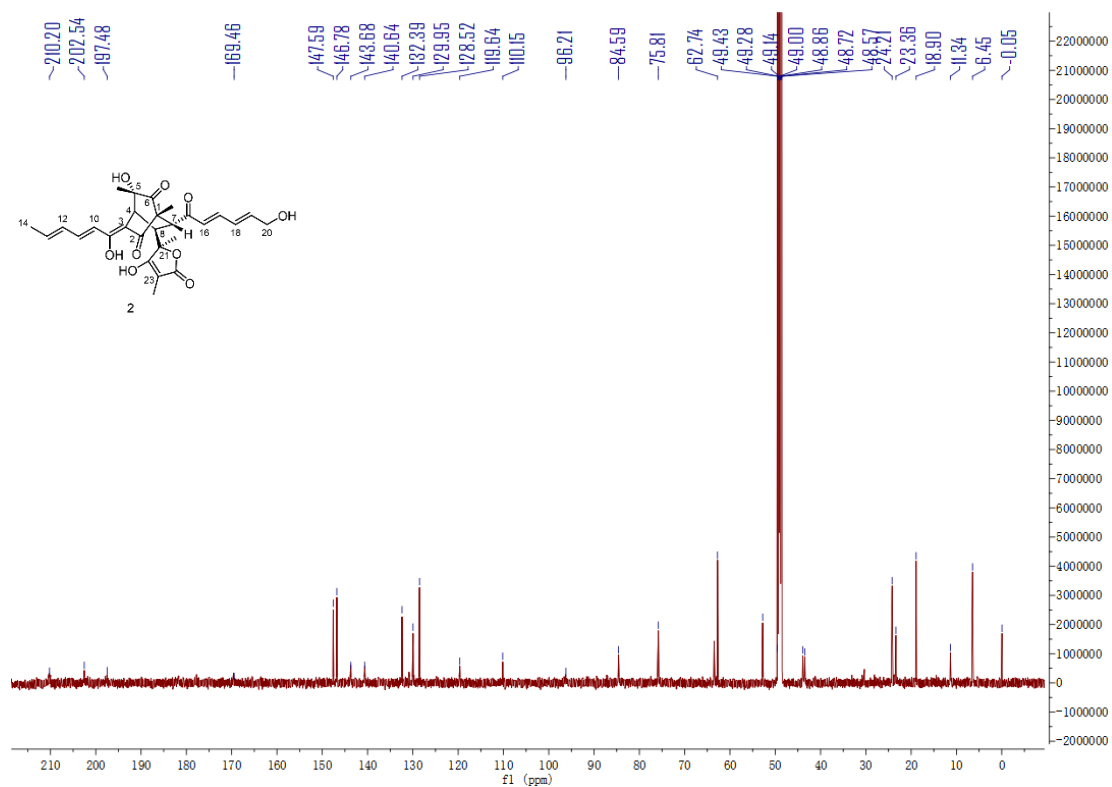

Figure.S9.  $^{13}\text{C}$  NMR (methanol- $d_4$ , 150 MHz) spectrum of compound 2

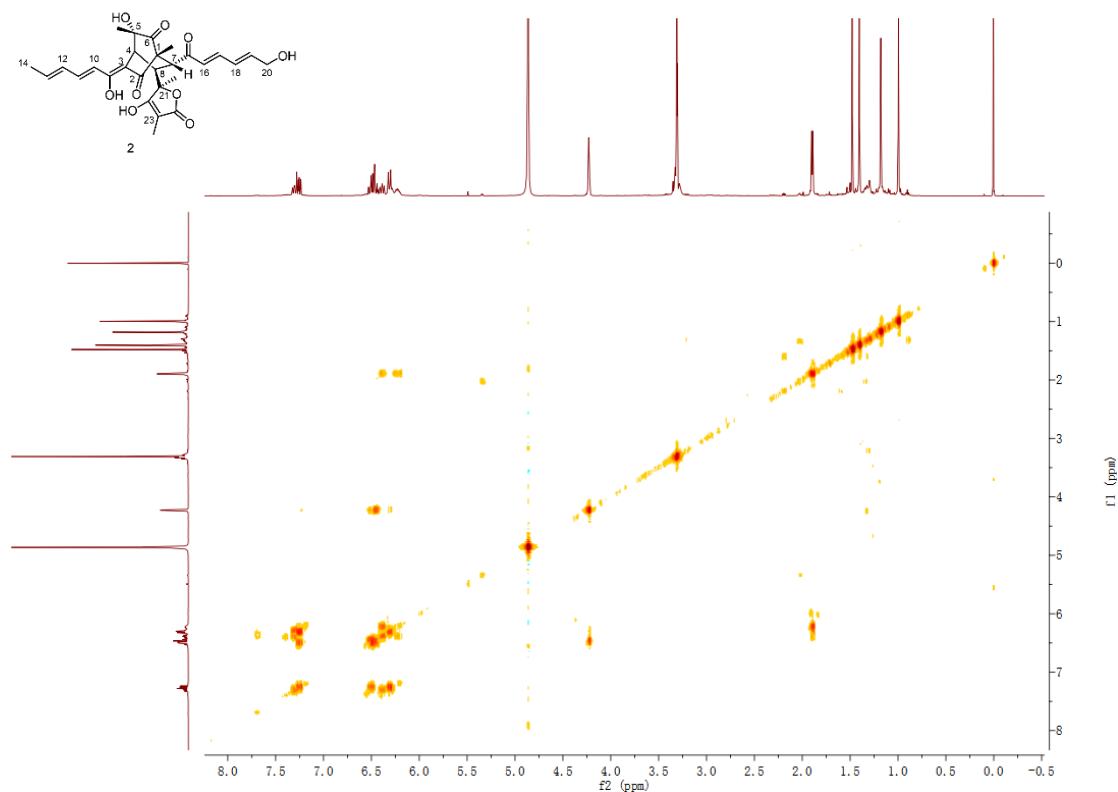

Figure.S10.  $^1\text{H}$ ,  $^1\text{H}$ -COSY spectrum (methanol- $d_4$ , 600 MHz) spectrum of compound 2

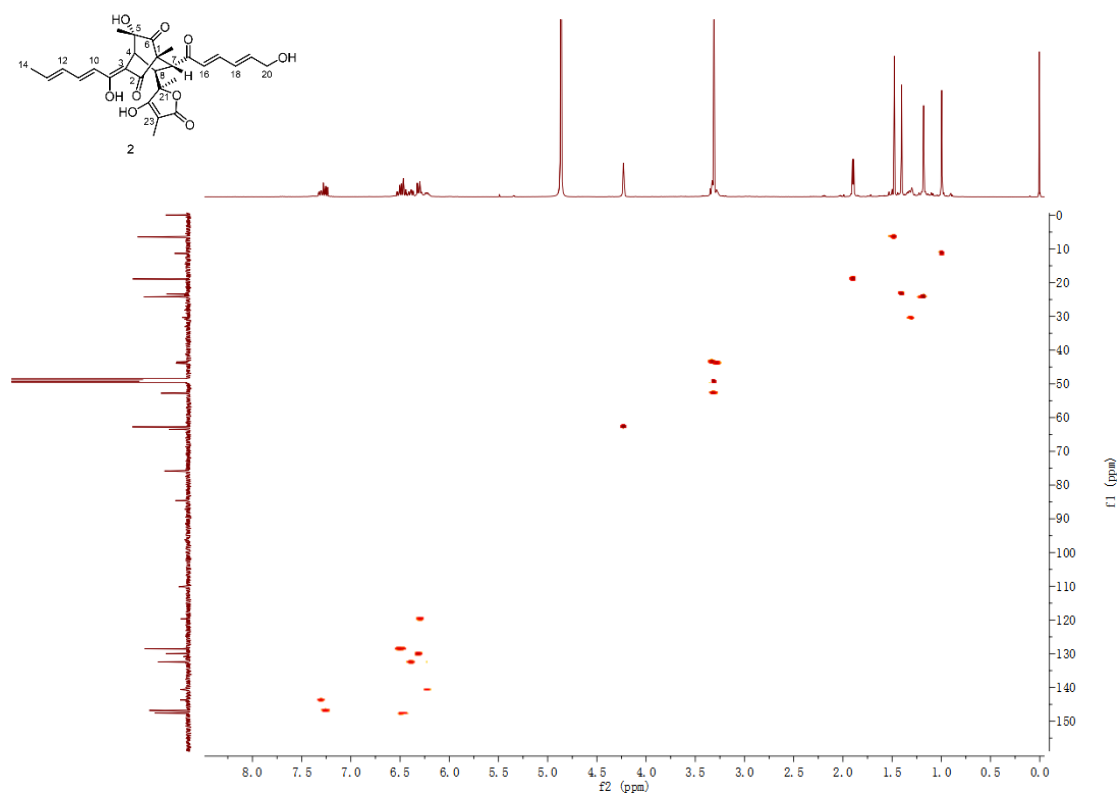

**Figure.S11.** HSQC spectrum (methanol-*d*<sub>4</sub>, 600 MHz) spectrum of compound **2**

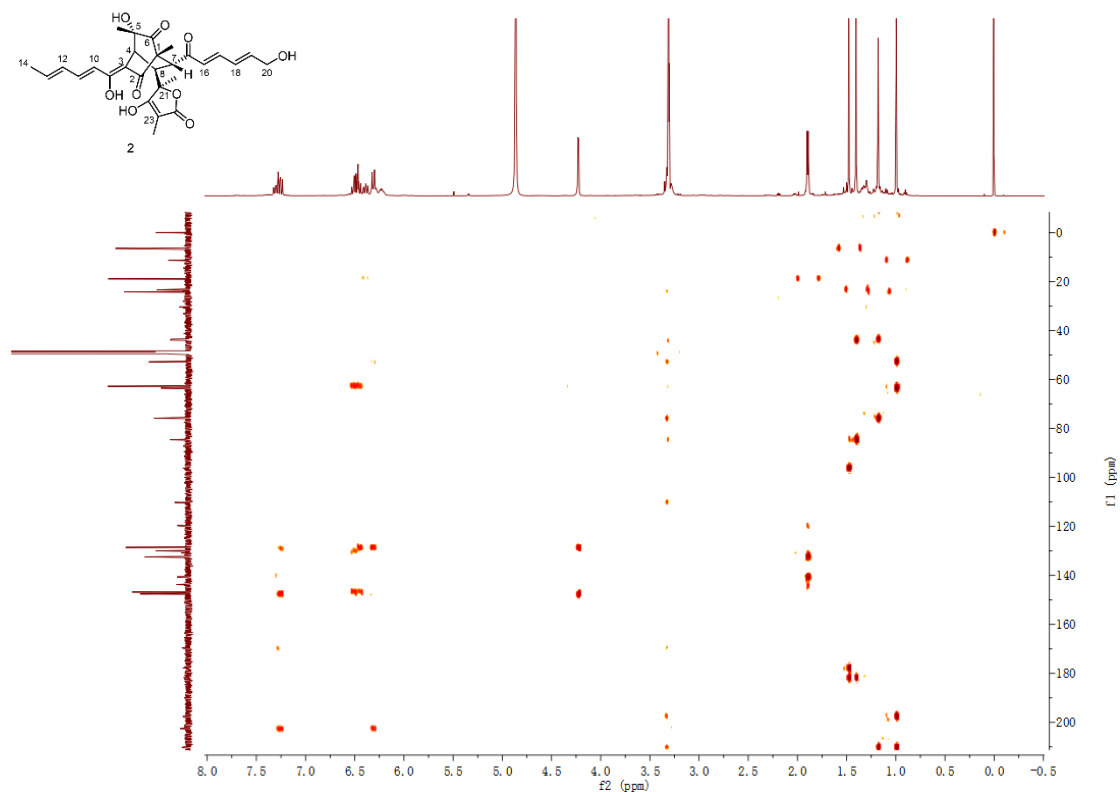

**Figure.S12.** HMBC spectrum (methanol-*d*<sub>4</sub>, 600 MHz) spectrum of compound **2**

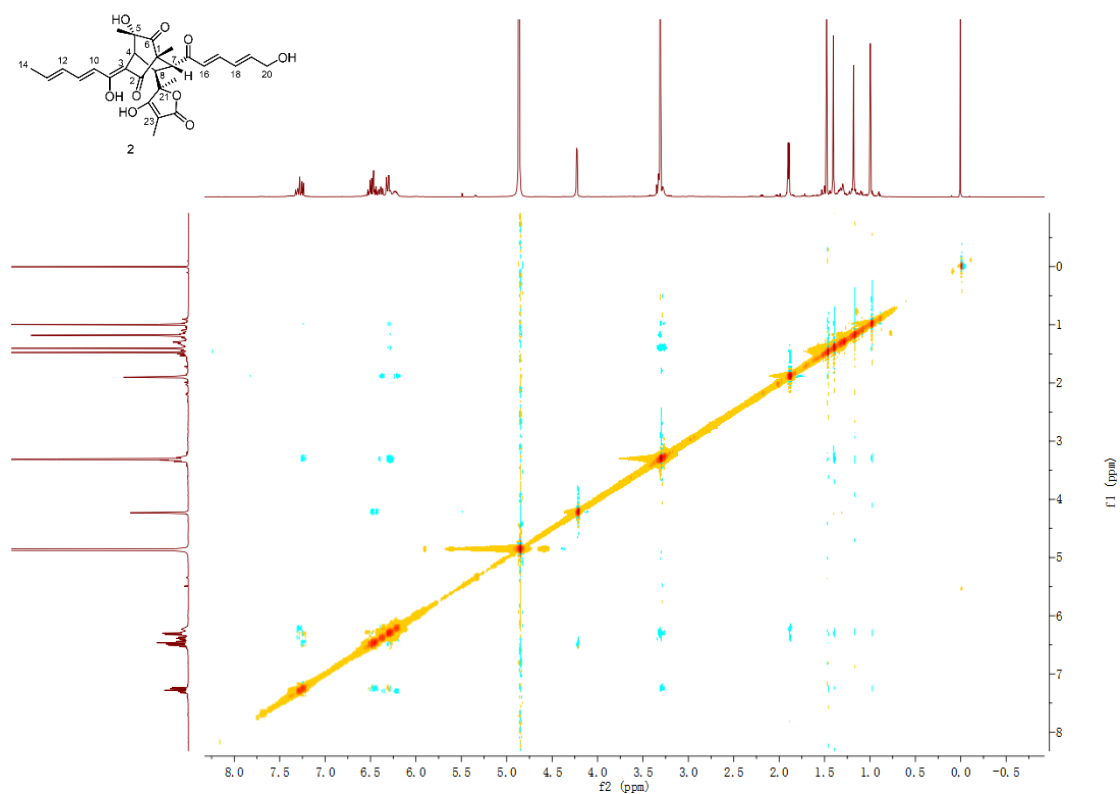

**Figure.S13.** NOESY spectrum (methanol- $d_4$ , 600 MHz) spectrum of compound **2**

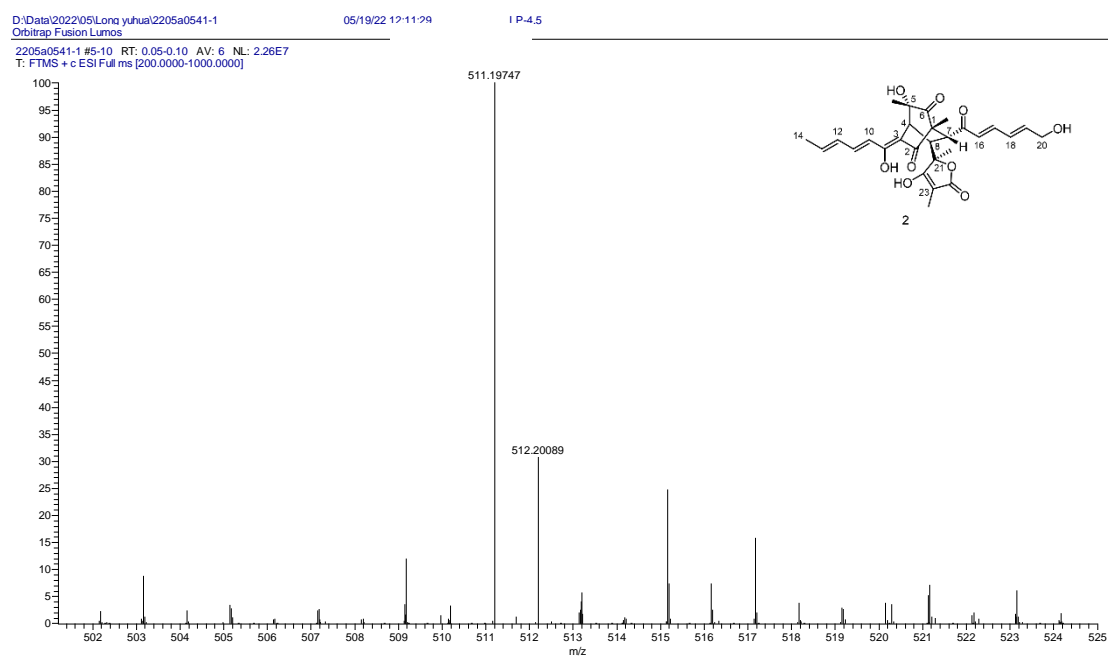

**Figure.S14.** HR-ESI-MS spectrum of compound **2**

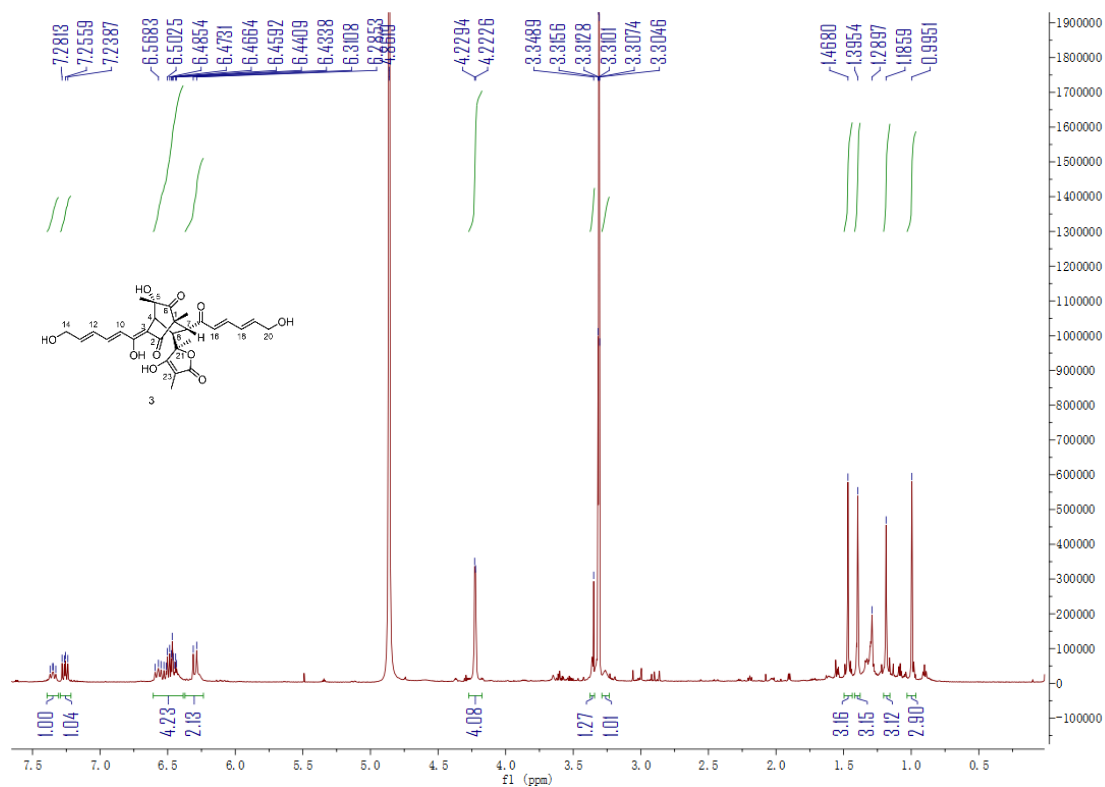

**Figure.S15.** <sup>1</sup>H NMR (methanol-*d*<sub>4</sub>, 600 MHz) spectrum of compound **3**

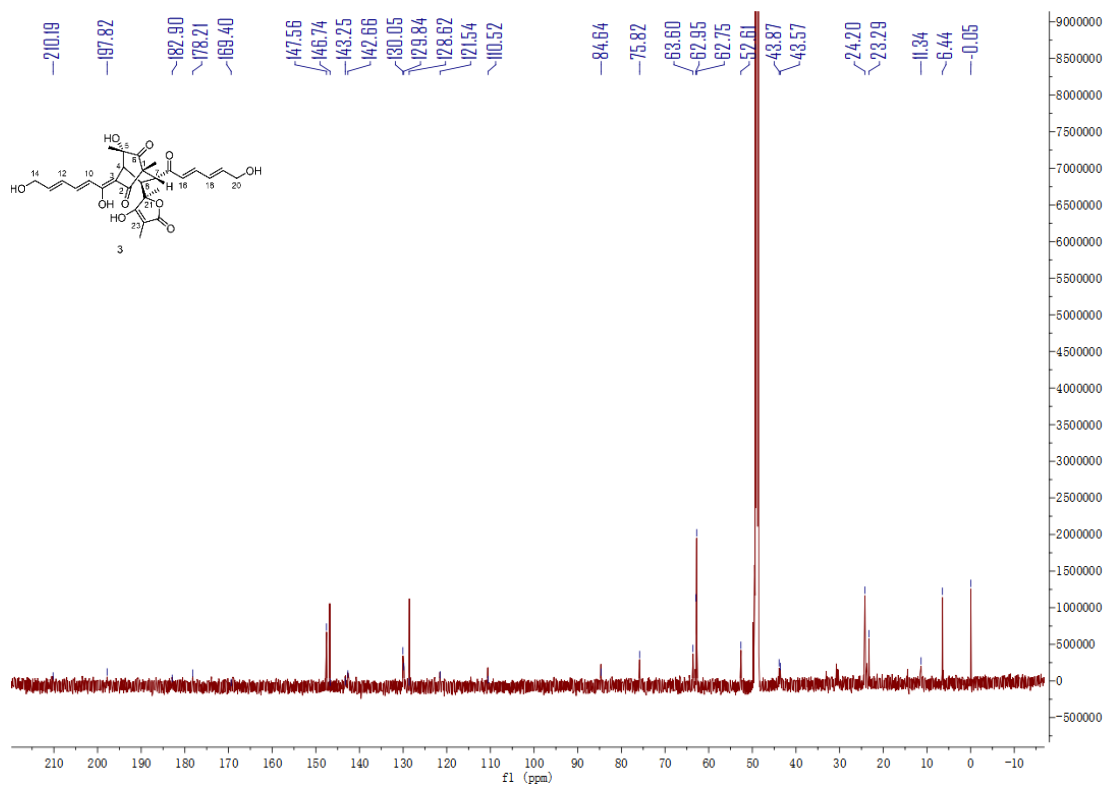

**Figure.S16.** <sup>13</sup>C NMR (methanol-*d*<sub>4</sub>, 150 MHz) spectrum of compound **3**

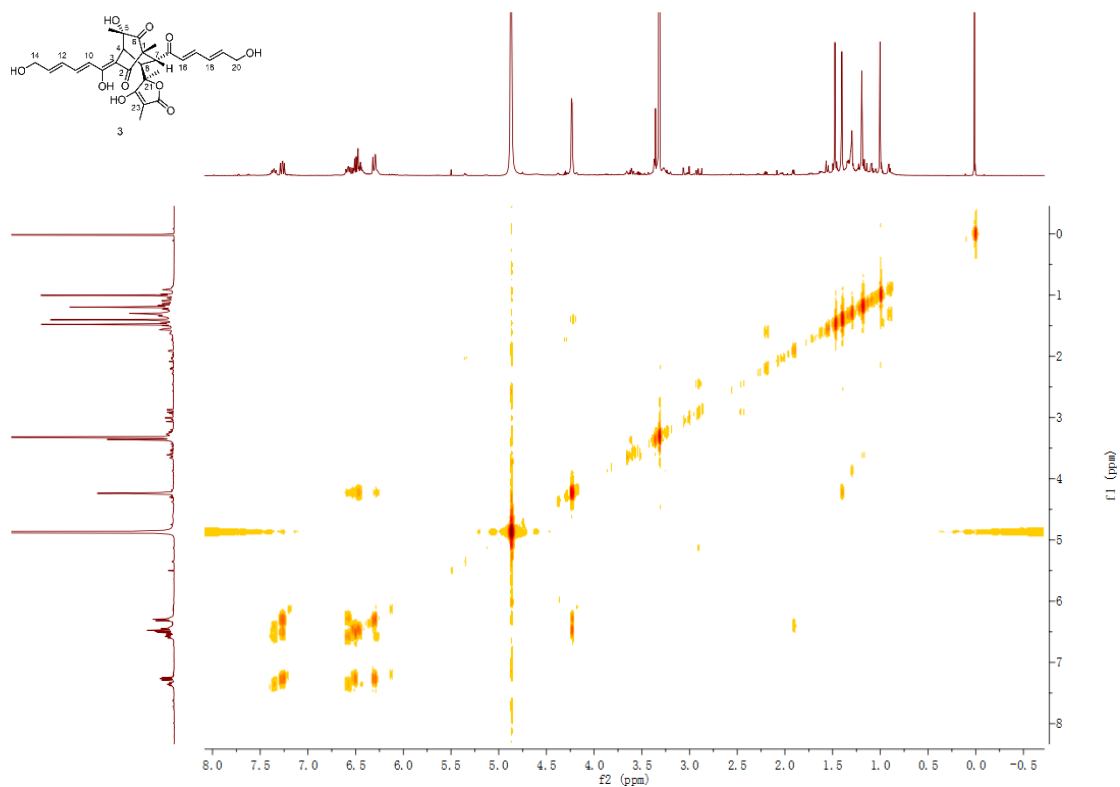

**Figure.S17.**  $^1\text{H}$ ,  $^1\text{H}$ - COSY spectrum (methanol- $d_4$ , 600 MHz) spectrum of compound **3**

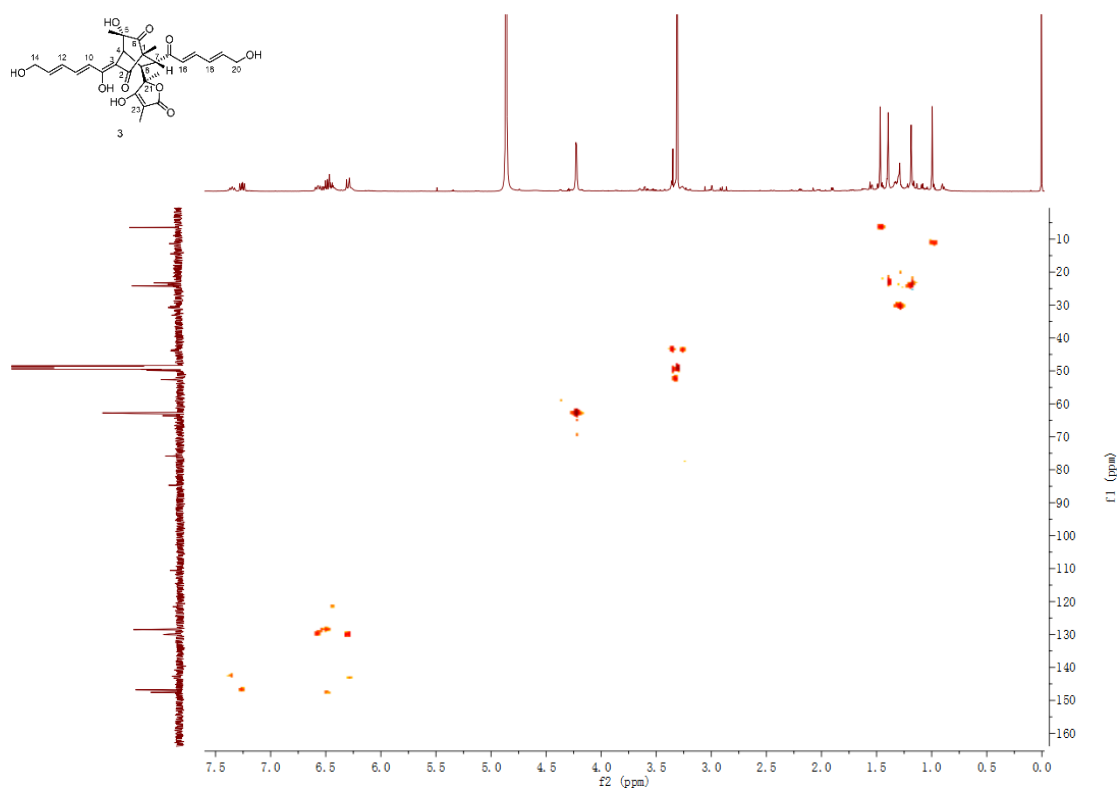

**Figure.S18.** HSQC spectrum (methanol- $d_4$ , 600 MHz) spectrum of compound **3**

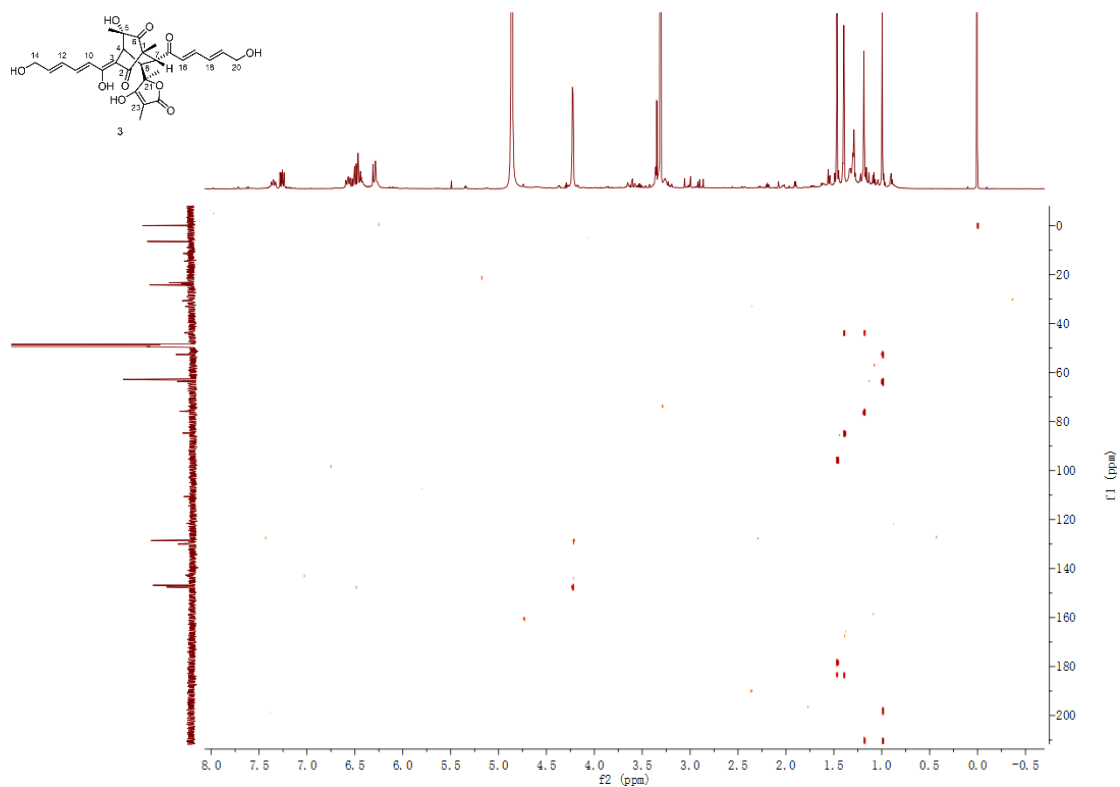

**Figure.S19.** HMBC spectrum (methanol-*d*<sub>4</sub>, 600 MHz) spectrum of compound **3**

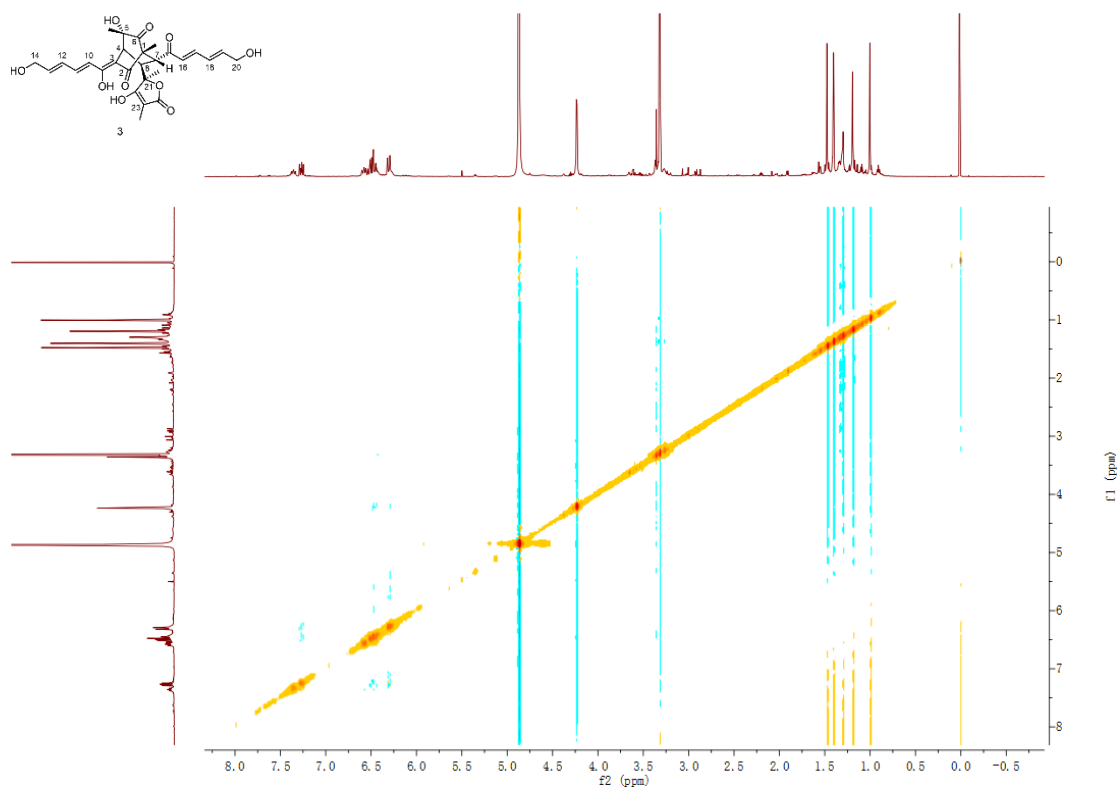

**Figure.S20.** NOESY spectrum (methanol-*d*<sub>4</sub>, 600 MHz) spectrum of compound **3**

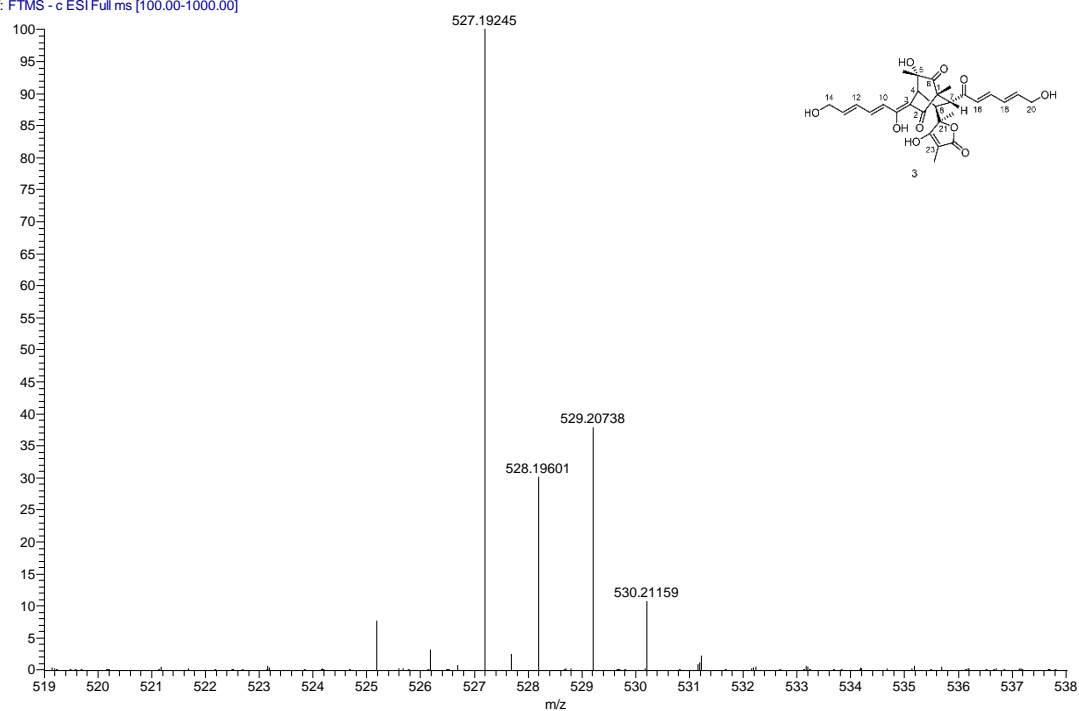

Figure.S21. HR-ESI-MS spectrum of compound 3

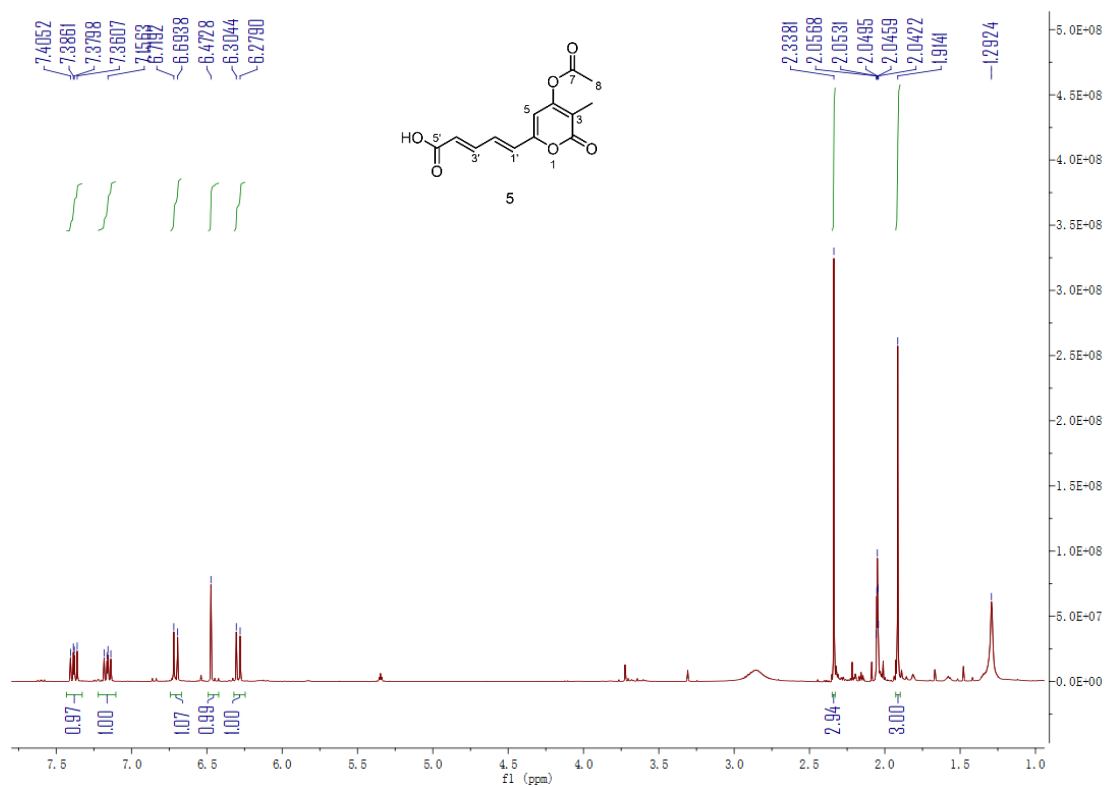Figure.S22. <sup>1</sup>H NMR (acetone-d<sub>6</sub>, 600 MHz) spectrum of compound 5.

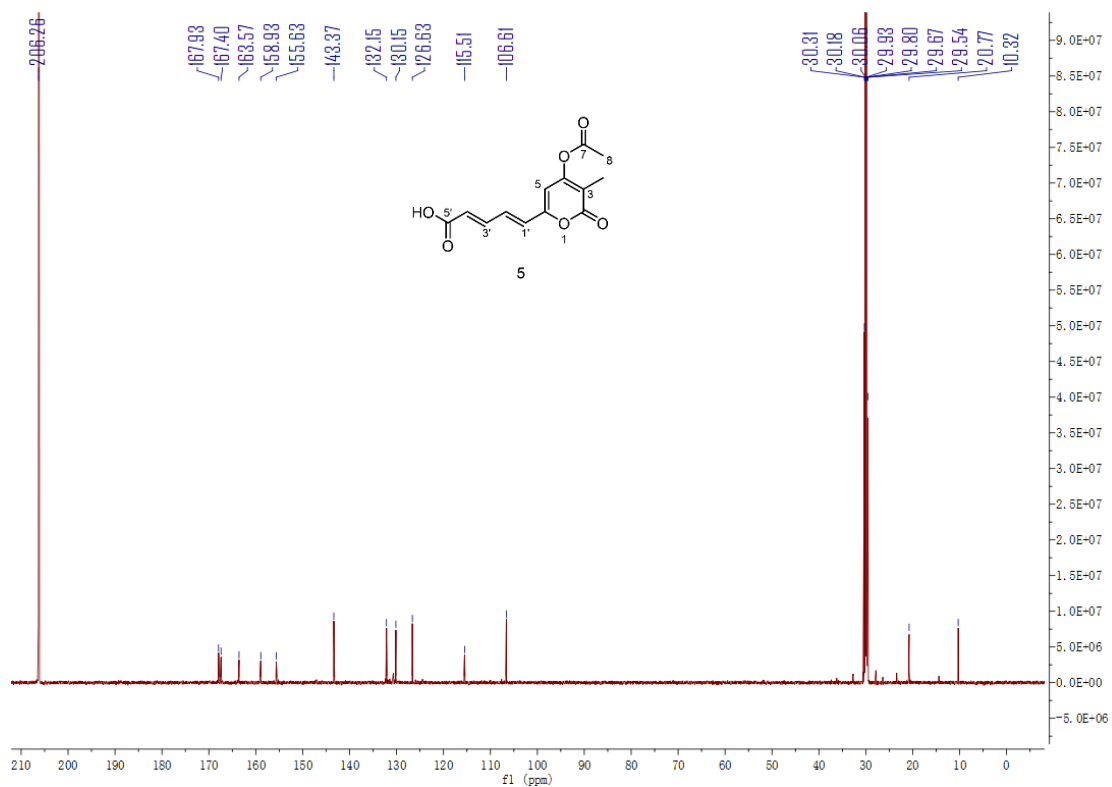

**Figure.S23.**  $^{13}\text{C}$  NMR (acetone- $d_6$ , 150 MHz) spectrum of compound **5**

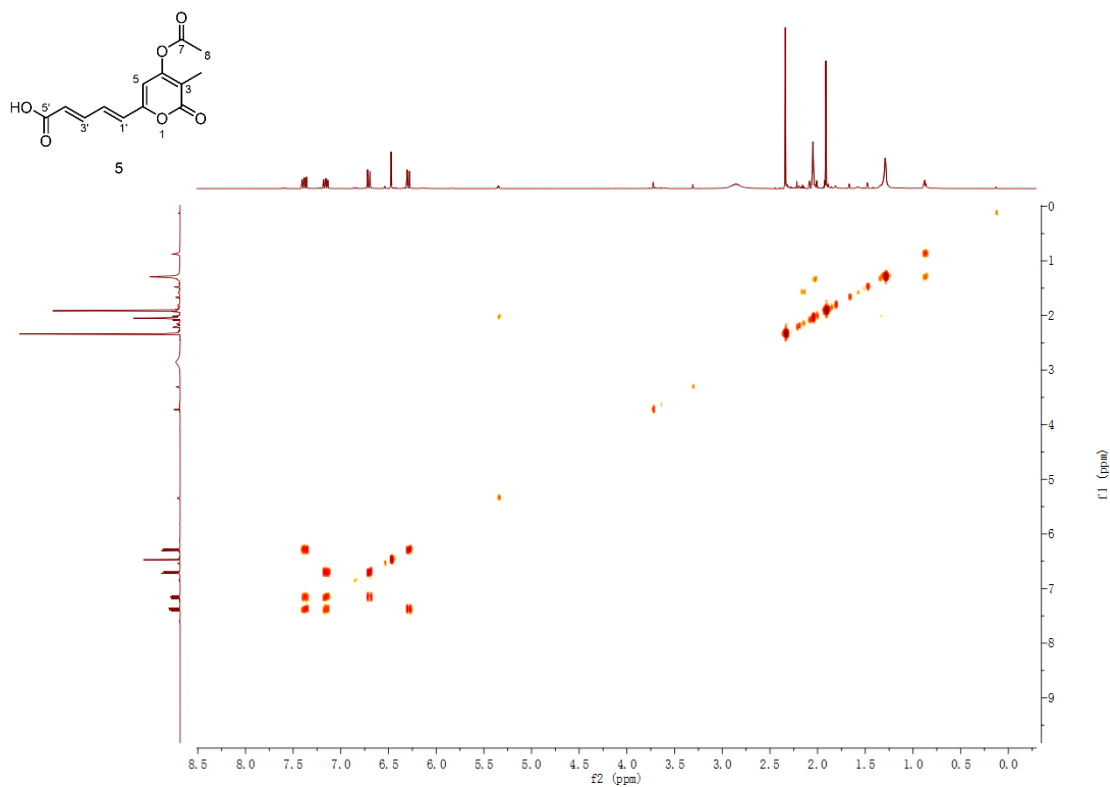

**Figure.S24.**  $^1\text{H}$ ,  $^1\text{H}$ -COSY spectrum (acetone- $d_6$ , 600 MHz) spectrum of compound **5**

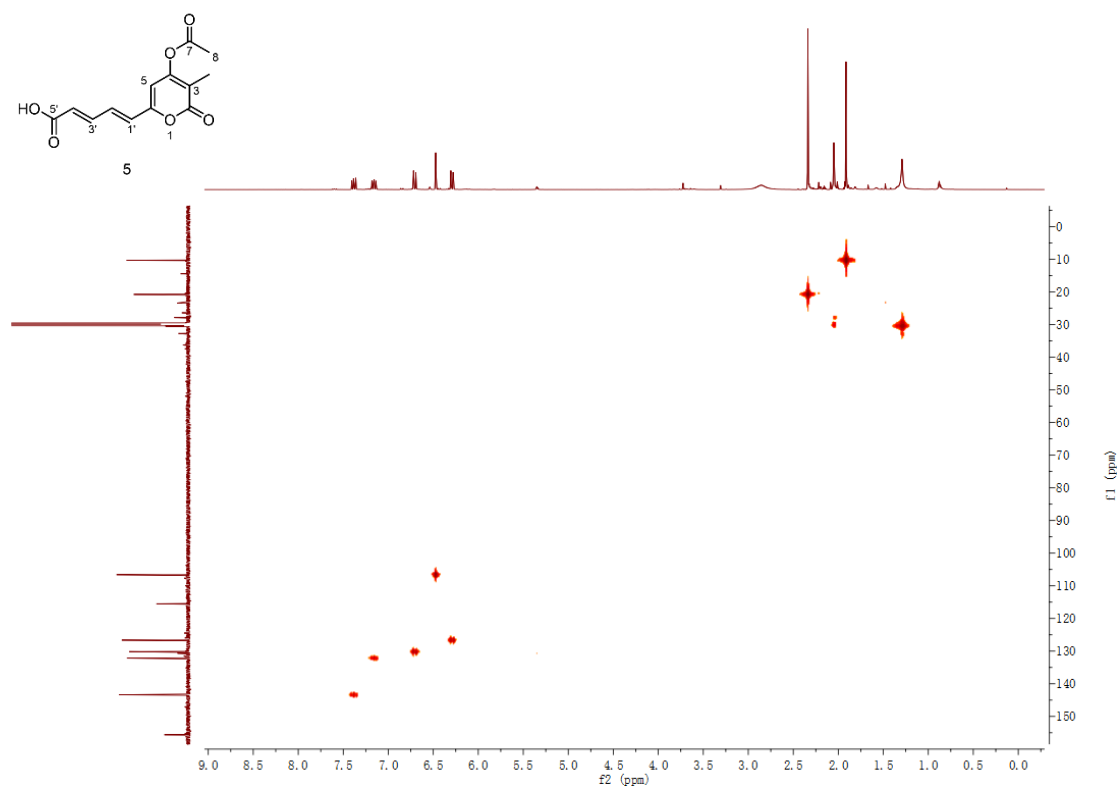

**Figure.S25.** HSQC spectrum (acetone- $d_6$ , 600 MHz) spectrum of compound **5**

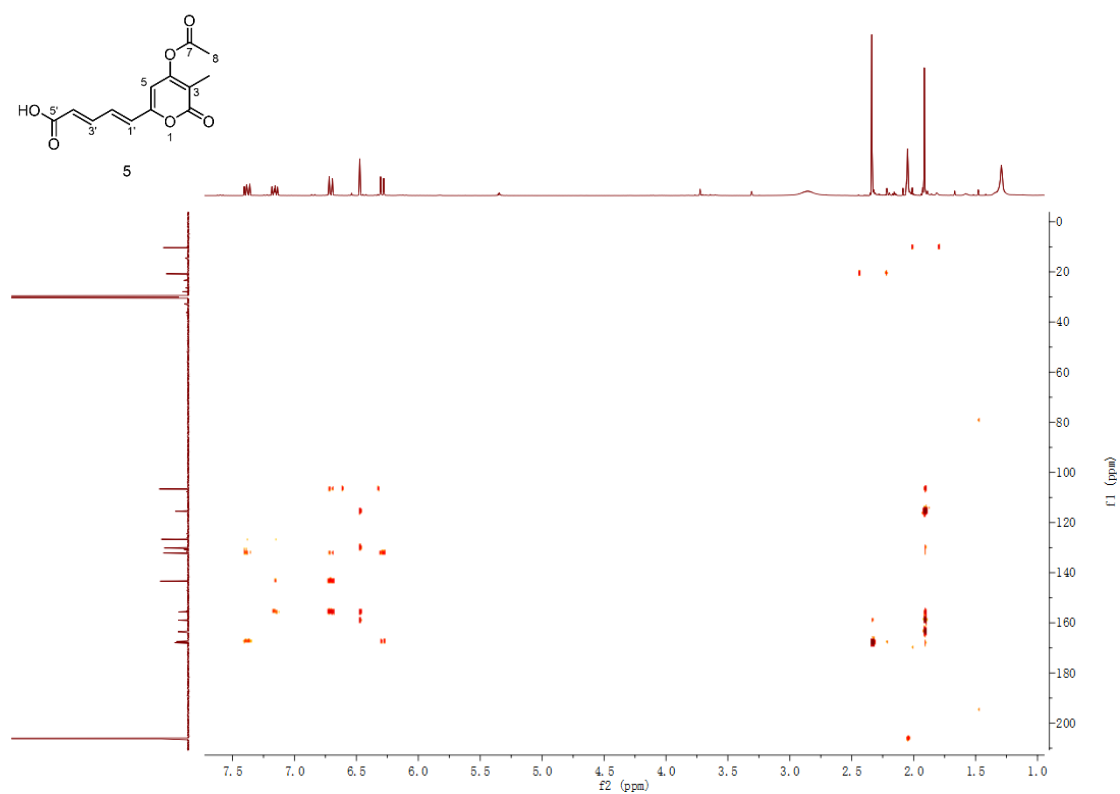

**Figure.S26.** HMBC spectrum (acetone- $d_6$ , 600 MHz) spectrum of compound **5**

2106A0617-1-neg\_HRMS #17-19 RT: 0.10-0.11 AV: 3 NL: 2.86E6  
T: FTMS - c ESI Full ms [100.00-1000.00]

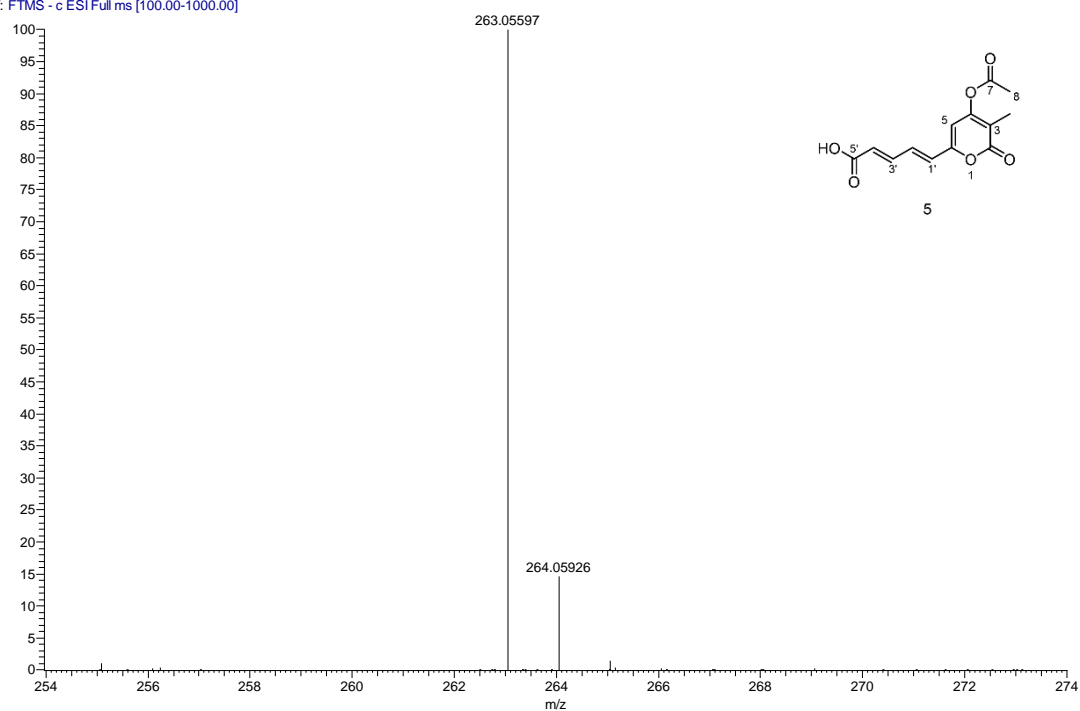

**Figure.S27.** HR-ESI-MS spectrum of compound **5**

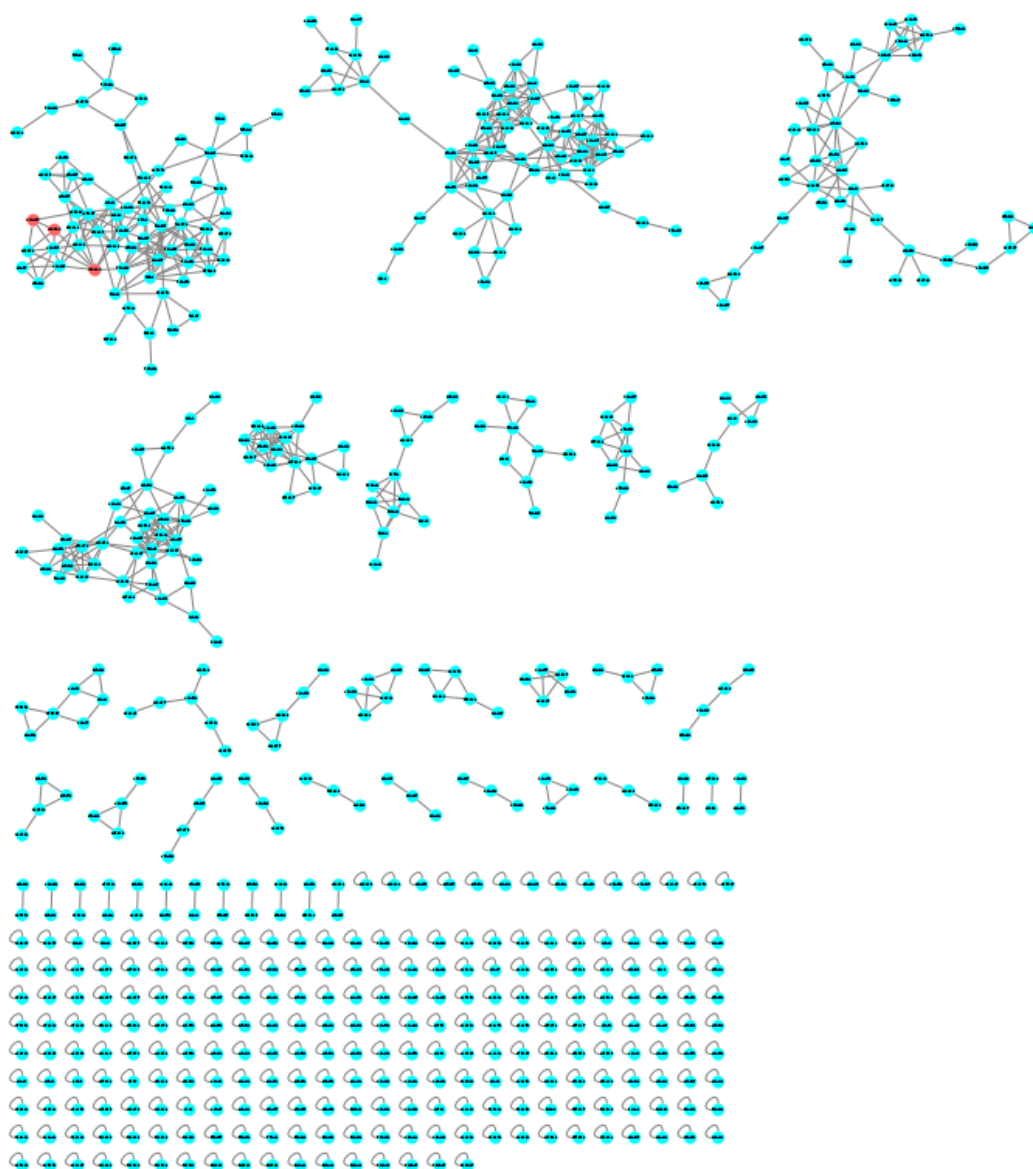

**Figure.S28.** Molecular networking of the EtOAc extract from strain *Trichoderma reesei* SCNU-F0042.
